# Supplementary material for: Large‐scale genetic panmixia in the blue shark (Prionace glauca): A single worldwide population, or a genetic lag‐time effect of the “grey zone” of differentiation?
Source: PubMed Central journal article supplement (PMC5978958; doi:10.1111/eva.12591), 2018-02-22

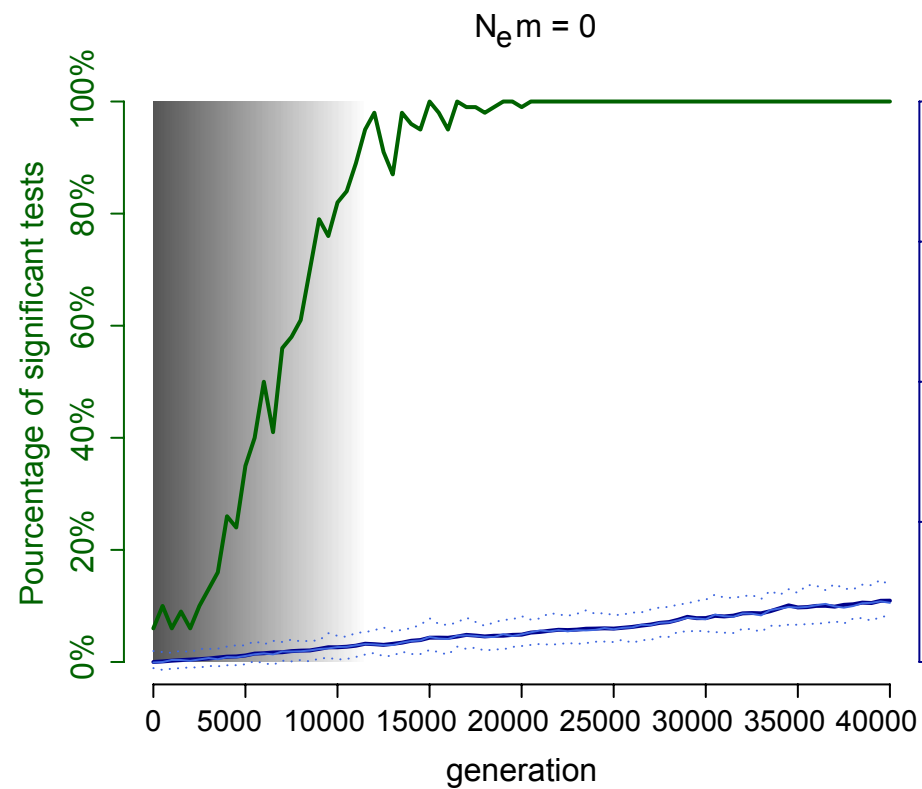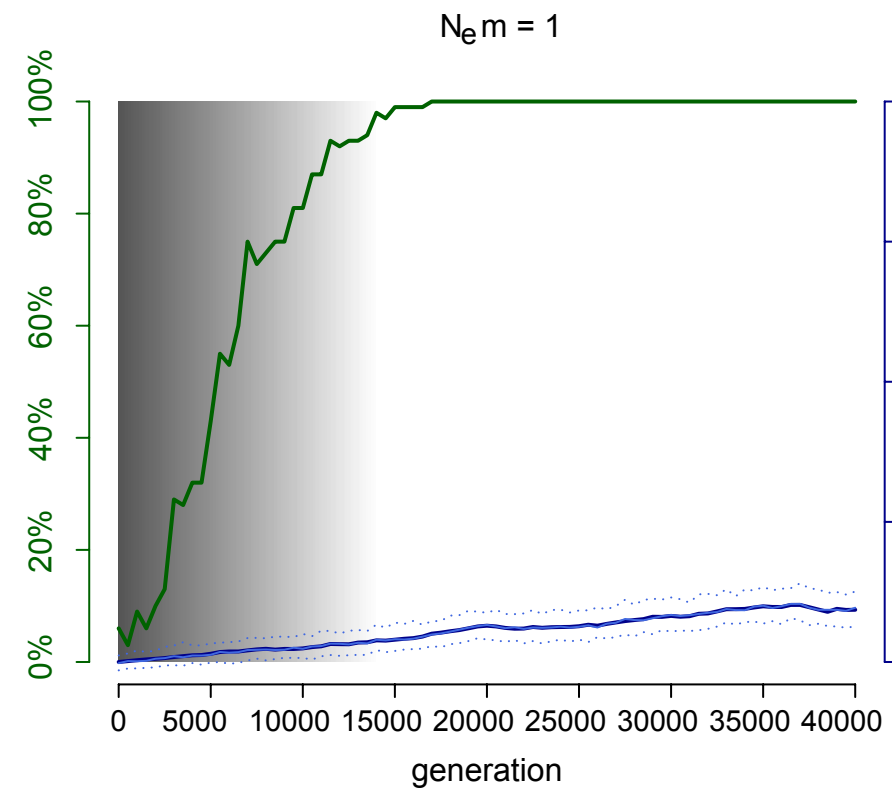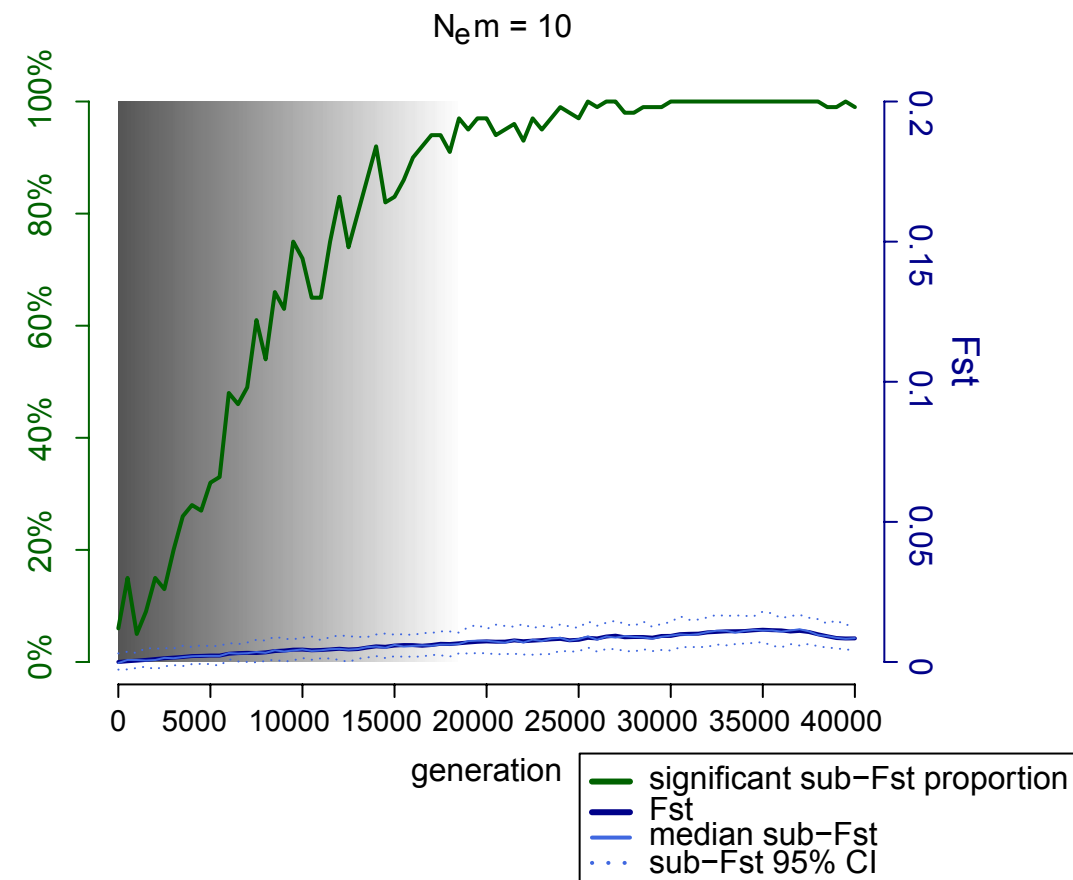

Supplement: EVA-11-614-s002.pdf [file EVA-11-614-s002.pdf]
